# Supplementary material
Source: publisher site journal article supplement (https://www.dovepress.com/get_supplementary_file.php?f=391716.docx)
Supplement: Supplementary file 1 [file get_supplementary_file.php]

**Supplementary** **Table 1** Summary of the Pharmacodynamics parameters after the multiple dose treatments according to time points

| Parameters | Time point  (h) | 10 mg dose group | | | 20 mg dose group | | |
| --- | --- | --- | --- | --- | --- | --- | --- |
| YPI-011 10/500 mg (N=40) | Pariet 10 mg  (N=40) | *p-value* | YPI-011 20/500 mg (N=39) | Pariet 20 mg  (N=39) | *p-value* |
| Δ Integrated gastric acidity (%) | 0.5 | 35.98 ± 55.16 | 27.27 ± 55.98 | 0.5131‡ | 44.16 ± 59.57 | 10.79 ± 103.83 | 0.0690† |
| 1 | 60.98 ± 37.62 | 31.96 ± 49.33 | 0.0082‡ | 73.49 ± 23.98 | 30.40 ± 63.10 | < 0.0001† |
| 4 | 79.51 ± 19.43 | 54.54 ± 28.32 | < 0.0001‡ | 90.28 ± 8.93 | 54.61 ± 47.37 | < 0.0001† |
| Percentage of time with gastric pH > 4 (%) | 0.5 | 17.20 ± 23.40 | 11.25 ± 14.78 | 0.1802† | 29.25 ± 33.47 | 9.82 ± 19.12 | < 0.0001† |
| 1 | 35.04 ± 27.13 | 8.79 ± 13.13 | < 0.0001† | 49.90 ± 30.96 | 13.41 ± 21.82 | < 0.0001‡ |
| 4 | 46.40 ± 28.00 | 21.74 ± 19.18 | < 0.0001‡ | 67.84 ± 25.60 | 28.99 ± 25.14 | < 0.0001‡ |
| **Notes:** Values are given as the mean ± standard deviation.  ‡ Paired t-test † Wilcoxon’s signed rank test | | | | | | | |

**Supplementary** **Table 2** Summary of Treatment emergent adverse events (TEAEs) by Systemic organ class and Preferred Term

| **System Organ Class** Preferred Term | 10 mg dose group | | | 20 mg dose group | | |
| --- | --- | --- | --- | --- | --- | --- |
| Test (N=40) | Reference  (N=43) | Total (N=43) | Test (N=41) | Reference (N=41) | Total (N=43) |
| **Subjects with TEAEs** | **9 (22.5) [11]** | **4 (9.3) [10]** | **10 (23.3) [21]** | **12 (29.3) [23]** | **11 (26.8) [22]** | **18 (41.9) [45]** |
| **Blood and lymphatic system disorders** | **0 (0.0) [0]** | **0 (0.0) [0]** | **0 (0.0) [0]** | **1 (2.4) [1]** | **1 (2.4) [1]** | **1 (2.3) [2]** |
| Leukopenia | 0 (0.0) [0] | 0 (0.0) [0] | 0 (0.0) [0] | 1 (2.4) [1] | 1 (2.4) [1] | 1 (2.3) [2] |
| **Cardiac disorders** | **0 (0.0) [0]** | **0 (0.0) [0]** | **0 (0.0) [0]** | **1 (2.4) [1]** | **0 (0.0) [0]** | **1 (2.3) [1]** |
| Palpitations | 0 (0.0) [0] | 0 (0.0) [0] | 0 (0.0) [0] | 1 (2.4) [1] | 0 (0.0) [0] | 1 (2.3) [1] |
| **Eye disorders** | **1 (2.5) [1]** | **0 (0.0) [0]** | **1 (2.3) [1]** | **0 (0.0) [0]** | **0 (0.0) [0]** | **0 (0.0) [0]** |
| Chalazion | 1 (2.5) [1] | 0 (0.0) [0] | 1 (2.3) [1] | 0 (0.0) [0] | 0 (0.0) [0] | 0 (0.0) [0] |
| **Gastrointestinal disorders** | **4 (10.0) [4]** | **3 (7.0) [6]** | **6 (14.0) [10]** | **7 (17.1) [9]** | **7 (17.1) [8]** | **12 (27.9) [17]** |
| Abdominal discomfort | 0 (0.0) [0] | 0 (0.0) [0] | 0 (0.0) [0] | 1 (2.4) [1] | 1 (2.4) [1] | 2 (4.7) [2] |
| Abdominal distension | 0 (0.0) [0] | 1 (2.3) [1] | 1 (2.3) [1] | 1 (2.4) [2] | 3 (7.3) [3] | 3 (7.0) [5] |
| Abdominal pain | 1 (2.5) [1] | 1 (2.3) [2] | 1 (2.3) [3] | 1 (2.4) [1] | 1 (2.4) [1] | 2 (4.7) [2] |
| Diarrhea | 1 (2.5) [1] | 1 (2.3) [1] | 2 (4.7) [2] | 1 (2.4) [1] | 2 (4.9) [2] | 2 (4.7) [3] |
| Dyspepsia | 1 (2.5) [1] | 0 (0.0) [0] | 1 (2.3) [1] | 1 (2.4) [1] | 0 (0.0) [0] | 1 (2.3) [1] |
| Gingival pain | 0 (0.0) [0] | 1 (2.3) [1] | 1 (2.3) [1] | 0 (0.0) [0] | 0 (0.0) [0] | 0 (0.0) [0] |
| Hyperesthesia teeth | 0 (0.0) [0] | 1 (2.3) [1] | 1 (2.3) [1] | 0 (0.0) [0] | 0 (0.0) [0] | 0 (0.0) [0] |
| Nausea | 1 (2.5) [1] | 0 (0.0) [0] | 1 (2.3) [1] | 3 (7.3) [3] | 1 (2.4) [1] | 4 (9.3) [4] |
| **General disorders and administration site conditions** | **1 (2.5) [1]** | **0 (0.0) [0]** | **1 (2.3) [1]** | **0 (0.0) [0]** | **1 (2.4) [1]** | **1 (2.3) [1]** |
| Medical device site discomfort | 1 (2.5) [1] | 0 (0.0) [0] | 1 (2.3) [1] | 0 (0.0) [0] | 0 (0.0) [0] | 0 (0.0) [0] |
| Pyrexia | 0 (0.0) [0] | 0 (0.0) [0] | 0 (0.0) [0] | 0 (0.0) [0] | 1 (2.4) [1] | 1 (2.3) [1] |
| **Infections and infestations** | **0 (0.0) [0]** | **0 (0.0) [0]** | **0 (0.0) [0]** | **1 (2.4) [1]** | **0 (0.0) [0]** | **1 (2.3) [1]** |
| Oral herpes | 0 (0.0) [0] | 0 (0.0) [0] | 0 (0.0) [0] | 1 (2.4) [1] | 0 (0.0) [0] | 1 (2.3) [1] |
| **Injury, poisoning and procedural complications** | **0 (0.0) [0]** | **0 (0.0) [0]** | **0 (0.0) [0]** | **2 (4.9) [3]** | **0 (0.0) [0]** | **2 (4.7) [3]** |
| Scar | 0 (0.0) [0] | 0 (0.0) [0] | 0 (0.0) [0] | 1 (2.4) [1] | 0 (0.0) [0] | 1 (2.3) [1] |
| Skin abrasion | 0 (0.0) [0] | 0 (0.0) [0] | 0 (0.0) [0] | 1 (2.4) [1] | 0 (0.0) [0] | 1 (2.3) [1] |
| Skin laceration | 0 (0.0) [0] | 0 (0.0) [0] | 0 (0.0) [0] | 1 (2.4) [1] | 0 (0.0) [0] | 1 (2.3) [1] |
| **Investigations** | **1 (2.5) [1]** | **0 (0.0) [0]** | **1 (2.3) [1]** | **0 (0.0) [0]** | **0 (0.0) [0]** | **0 (0.0) [0]** |
| Blood uric acid increased | 1 (2.5) [1] | 0 (0.0) [0] | 1 (2.3) [1] | 0 (0.0) [0] | 0 (0.0) [0] | 0 (0.0) [0] |
| **Musculoskeletal and connective tissue disorders** | **0 (0.0) [0]** | **2 (4.7) [2]** | **2 (4.7) [2]** | **0 (0.0) [0]** | **0 (0.0) [0]** | **0 (0.0) [0]** |
| Back pain | 0 (0.0) [0] | 1 (2.3) [1] | 1 (2.3) [1] | 0 (0.0) [0] | 0 (0.0) [0] | 0 (0.0) [0] |
| Temporomandibular joint syndrome | 0 (0.0) [0] | 1 (2.3) [1] | 1 (2.3) [1] | 0 (0.0) [0] | 0 (0.0) [0] | 0 (0.0) [0] |
| **Neoplasms benign, malignant and unspecified** | **0 (0.0) [0]** | **0 (0.0) [0]** | **0 (0.0) [0]** | **0 (0.0) [0]** | **1 (2.4) [1]** | **1 (2.3) [1]** |
| Lipoma | 0 (0.0) [0] | 0 (0.0) [0] | 0 (0.0) [0] | 0 (0.0) [0] | 1 (2.4) [1] | 1 (2.3) [1] |
| **Nervous system disorders** | **1 (2.5) [1]** | **1 (2.3) [2]** | **2 (4.7) [3]** | **4 (9.8) [6]** | **4 (9.8) [5]** | **8 (18.6) [11]** |
| Dizziness | 1 (2.5) [1] | 0 (0.0) [0] | 1 (2.3) [1] | 0 (0.0) [0] | 1 (2.4) [1] | 1 (2.3) [1] |
| Headache | 0 (0.0) [0] | 1 (2.3) [1] | 1 (2.3) [1] | 3 (7.3) [4] | 2 (4.9) [2] | 5 (11.6) [6] |
| Migraine | 0 (0.0) [0] | 0 (0.0) [0] | 0 (0.0) [0] | 0 (0.0) [0] | 1 (2.4) [2] | 1 (2.3) [2] |
| Paresthesia | 0 (0.0) [0] | 1 (2.3) [1] | 1 (2.3) [1] | 1 (2.4) [1] | 0 (0.0) [0] | 1 (2.3) [1] |
| Syncope | 0 (0.0) [0] | 0 (0.0) [0] | 0 (0.0) [0] | 0 (0.0) [0] | 1 (2.4) [1] | 1 (2.3) [1] |
| **Reproductive system and breast disorders** | **2 (5.0) [2]** | **0 (0.0) [0]** | **2 (4.7) [2]** | **1 (2.4) [1]** | **1 (2.4) [2]** | **1 (2.3) [3]** |
| Intermenstrual bleeding | 0 (0.0) [0] | 0 (0.0) [0] | 0 (0.0) [0] | 0 (0.0) [0] | 1 (2.4) [1] | 1 (2.3) [1] |
| Ovulation pain | 0 (0.0) [0] | 0 (0.0) [0] | 0 (0.0) [0] | 0 (0.0) [0] | 1 (2.4) [1] | 1 (2.3) [1] |
| Premenstrual headache | 2 (5.0) [2] | 0 (0.0) [0] | 2 (4.7) [2] | 0 (0.0) [0] | 0 (0.0) [0] | 0 (0.0) [0] |
| Premenstrual pain | 0 (0.0) [0] | 0 (0.0) [0] | 0 (0.0) [0] | 1 (2.4) [1] | 0 (0.0) [0] | 1 (2.3) [1] |
| **Respiratory, thoracic and mediastinal disorders** | **1 (2.5) [1]** | **0 (0.0) [0]** | **1 (2.3) [1]** | **0 (0.0) [0]** | **1 (2.4) [1]** | **1 (2.3) [1]** |
| Pharyngeal swelling | 0 (0.0) [0] | 0 (0.0) [0] | 0 (0.0) [0] | 0 (0.0) [0] | 1 (2.4) [1] | 1 (2.3) [1] |
| Productive cough | 1 (2.5) [1] | 0 (0.0) [0] | 1 (2.3) [1] | 0 (0.0) [0] | 0 (0.0) [0] | 0 (0.0) [0] |
| **Skin and subcutaneous tissue disorders** | **0 (0.0) [0]** | **0 (0.0) [0]** | **0 (0.0) [0]** | **1 (2.4) [1]** | **3 (7.3) [3]** | **4 (9.3) [4]** |
| Cold sweat | 0 (0.0) [0] | 0 (0.0) [0] | 0 (0.0) [0] | 0 (0.0) [0] | 1 (2.4) [1] | 1 (2.3) [1] |
| Erythema | 0 (0.0) [0] | 0 (0.0) [0] | 0 (0.0) [0] | 0 (0.0) [0] | 1 (2.4) [1] | 1 (2.3) [1] |
| Hyperhidrosis | 0 (0.0) [0] | 0 (0.0) [0] | 0 (0.0) [0] | 1 (2.4) [1] | 0 (0.0) [0] | 1 (2.3) [1] |
| Rash | 0 (0.0) [0] | 0 (0.0) [0] | 0 (0.0) [0] | 0 (0.0) [0] | 1 (2.4) [1] | 1 (2.3) [1] |

**Notes:** Data are shown as the number of subjects (percentage of subjects) [number of events].
